# Supplementary material for: Plasticization and thermal behavior of hydroxyl and nitrogen rich group-containing tung-oil-based ester plasticizers for PVC
Source: Royal Society of Chemistry journal article supplement (doi:10.1039/c7nj03578k), 2017-12-21
Supplement: c7nj03578k1.pdf [file c7nj03578k1.pdf]

## Supporting Information For

Plasticization and thermal behavior of hydroxyl and nitrogen rich groups-containing  
tung-oil-based esters plasticizers for PVC

Mei Wang <sup>a</sup>, Xianghai Song <sup>b,1</sup>, Jianchun Jiang <sup>a</sup>, Jianling Xia <sup>a,c</sup>, Haiyang Ding <sup>a</sup>, Mei  
Li<sup>a,\*</sup>

<sup>a</sup> Institute of Chemical Industry of Forestry Products, CAF; Key Lab. of Biomass  
Energy and Material, Jiangsu Province; National Engineering Lab. for Biomass  
Chemical Utilization; Key and Lab. on Forest Chemical Engineering, SFA, Nanjing  
210042, PR China

<sup>b</sup> School of Chemistry and Chemical Engineering, Southeast University, Nanjing  
211189, China.

<sup>c</sup> Institute of Forest New Technology, CAF, Beijing 100091, PR China

<sup>1</sup>Xianghai Song contributes to this paper the same as the first author (Mei Wang).

Corresponding author at: Institute of Chemical Industry of Forestry Products, Chinese  
Academy of Forestry, No. 16 Suojin 5th village, Nanjing  
210042, PR China.

E-mail address: meiyu20032001@126.com (M. Li).

Number of pages in the supporting information: 3

Number of figures in the supporting information: 1

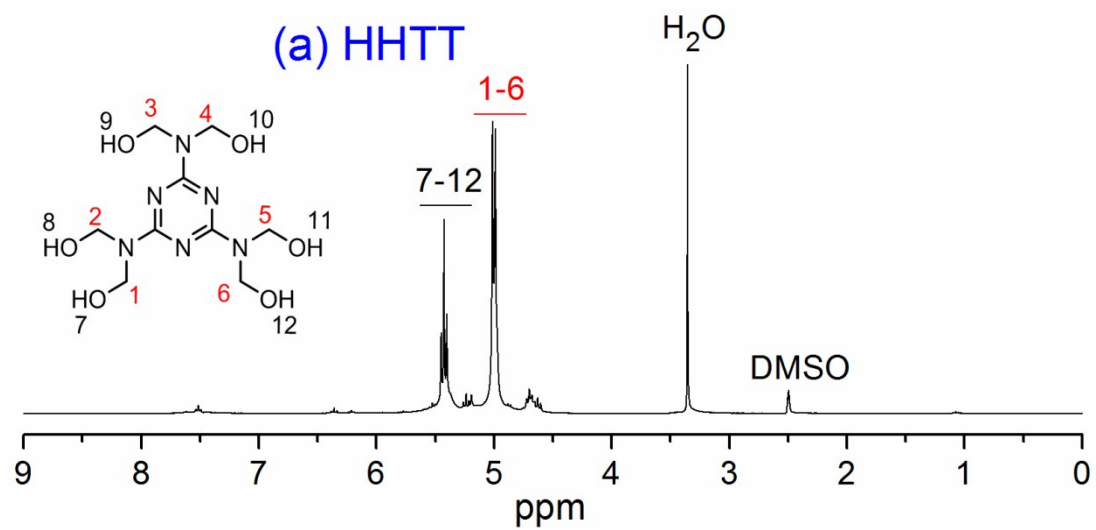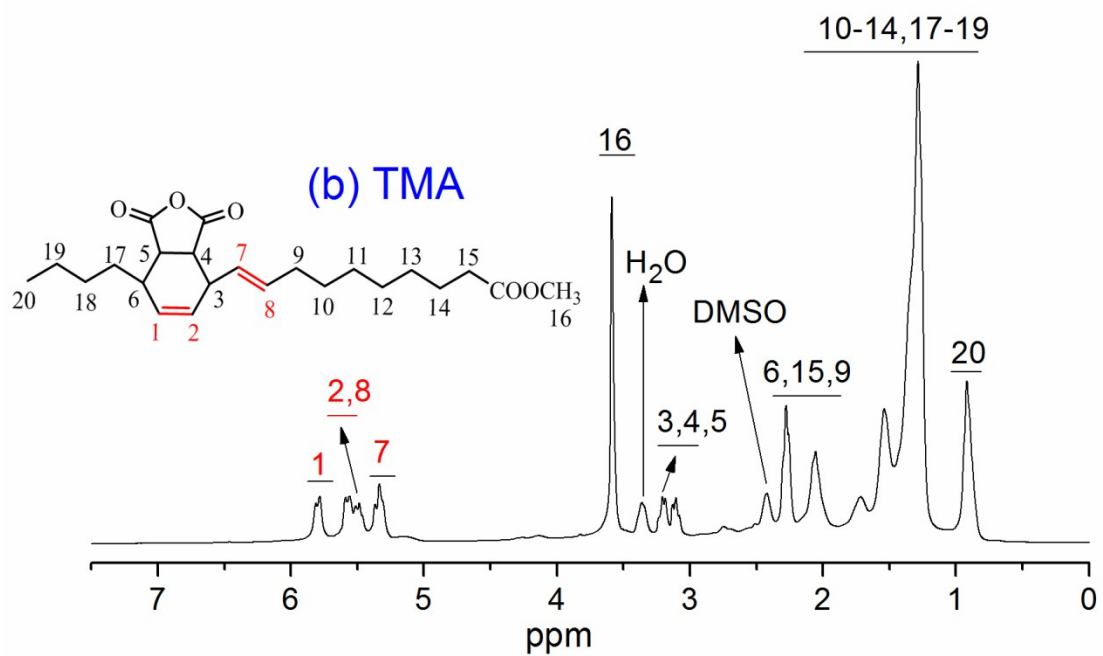

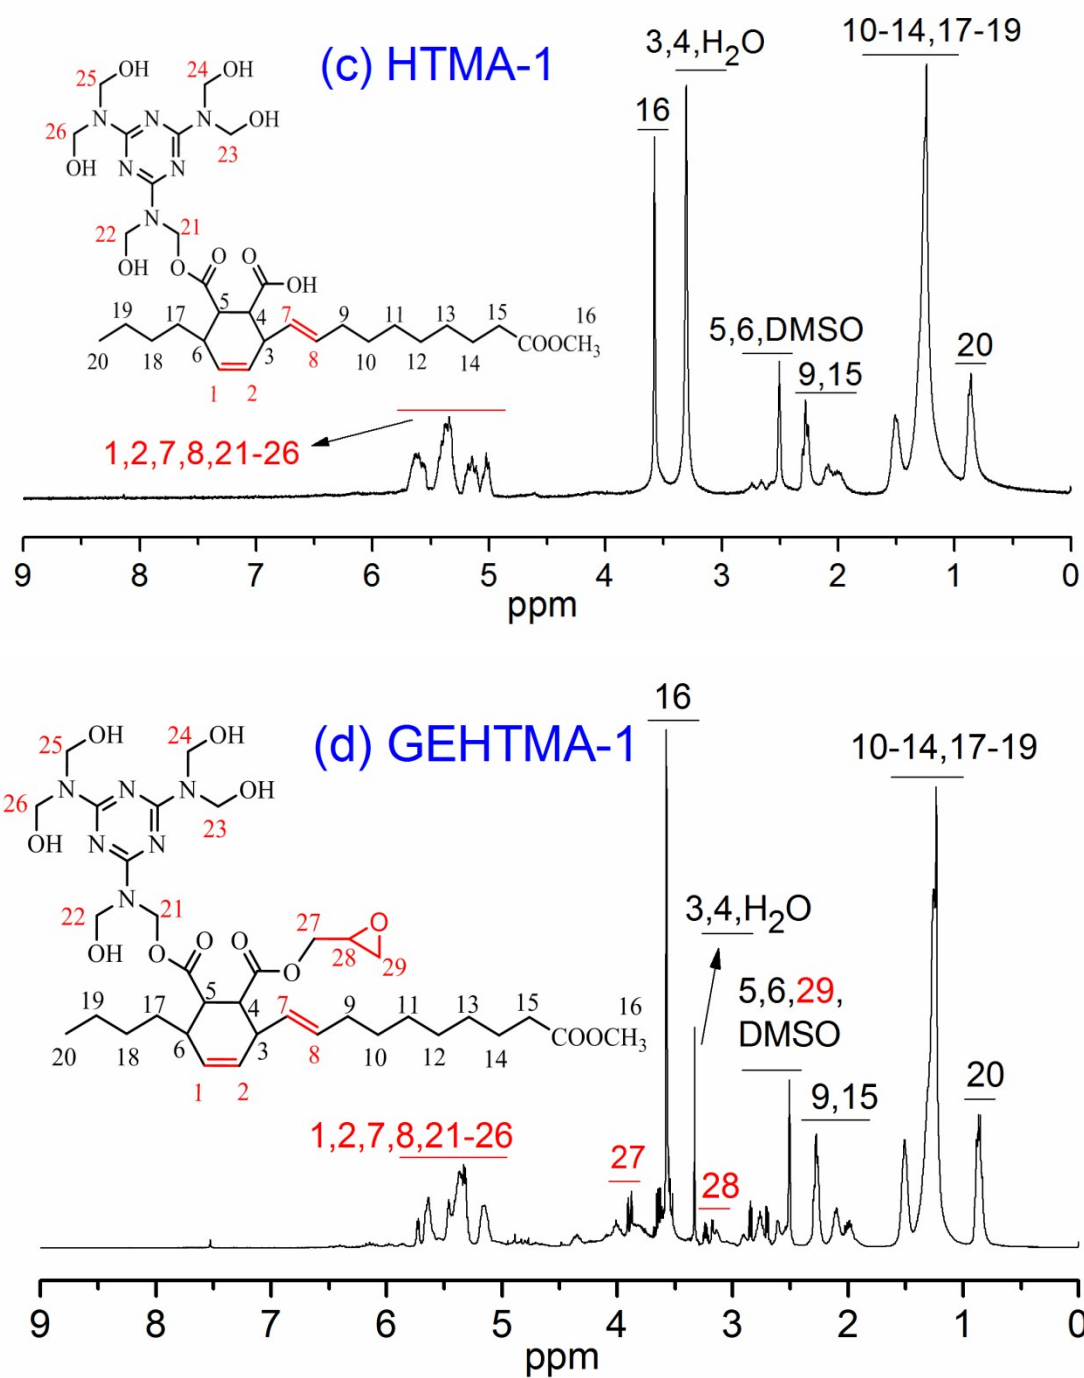

**Fig. S1.**  $^1\text{H}$  NMR spectra of HHTT (a), TMA (b), HTMA-1 (c) and GEHTMA-1 (d)
